# Supplementary material for: A novel hierachically-nanostructured Pt/SiO2/Fe3O4 catalyst with high activity and recyclability towards hydrosilylation
Source: Royal Society of Chemistry journal article supplement (doi:10.1039/c6ra16944a), 2016-01-01
Supplement: c6ra16944a1.pdf [file c6ra16944a1.pdf]

## Supporting Information

### A Novel Hierarchically-nanostructured Pt/SiO<sub>2</sub>/Fe<sub>3</sub>O<sub>4</sub> Catalyst with High Activity and Recyclability towards the Hydrosilylation

Huachao Zai,<sup>a,b</sup> Yizhou Zhao,<sup>a,b</sup> Shanyu Chen,<sup>a,b</sup> Rui Wang,<sup>b</sup> Lei Ge,<sup>a,b</sup> Changfeng Chen,<sup>a,b</sup> Yujing Li<sup>a,b,c,\*</sup>

a. Department of Materials Science and Engineering, College of Science, China University of Petroleum, Beijing, Changping, 102249, China.

b. State Key Laboratory of Heavy Oil, China University of Petroleum, Beijing, Changping, 102249, China.

c. School of Materials Science and Engineering, Beijing Institute of Technology, Haidian, 100081, China.

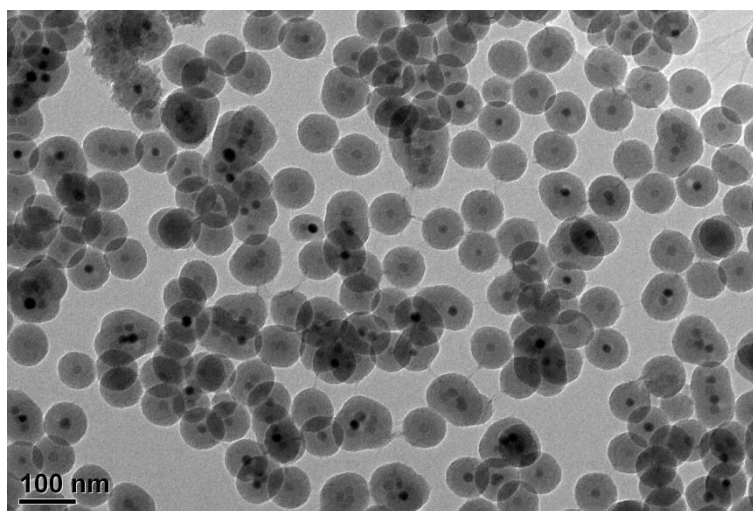

**SI 1** The shell thickness increased with increasing TEOS content from 20  $\mu\text{L}$  to 50  $\mu\text{L}$ .

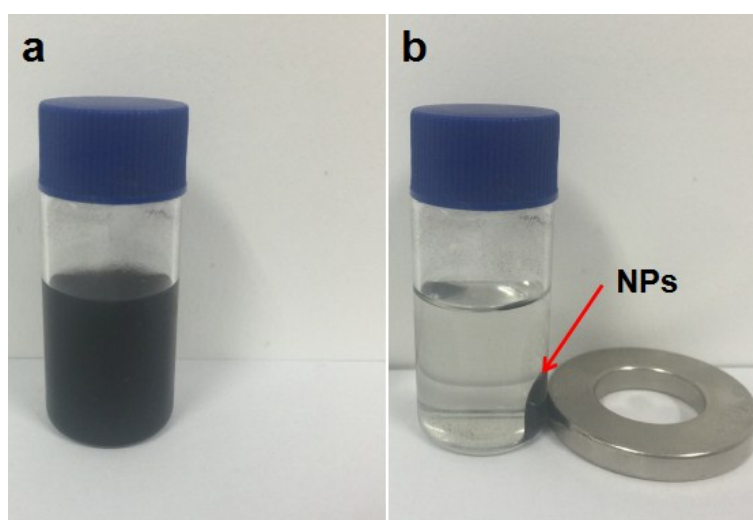

**SI 2** Photographs of the nanoparticle solutions (a) before and (b) after magnetic separation by an external magnetic field.

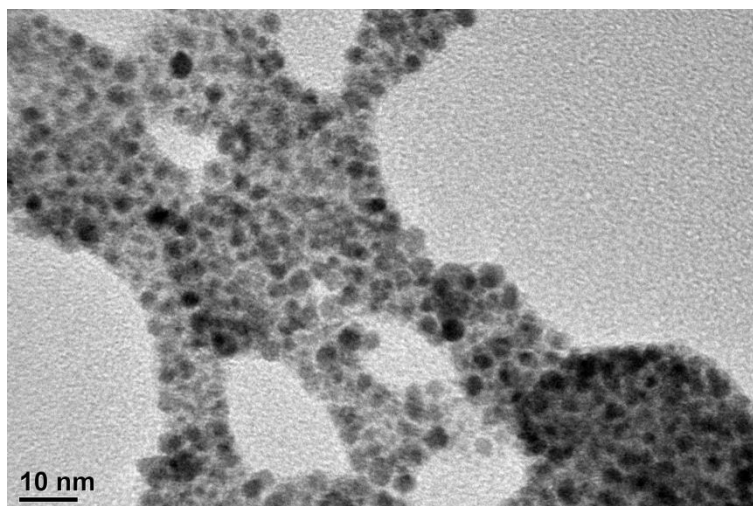

SI 3 TEM image of Pt NPs without SiO<sub>2</sub>/Fe<sub>3</sub>O<sub>4</sub> support.

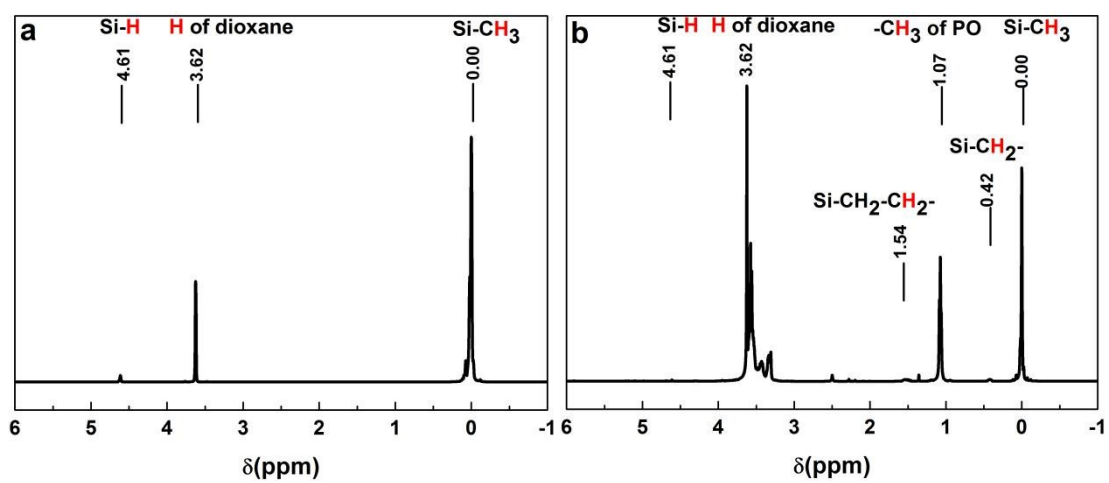

SI 4 <sup>1</sup>H NMR spectra of (a) low-hydro silicone oil, (b) the hydrosilylation product with dioxane as the internal standard.

$$\frac{S_A}{S_B} = \frac{W_1 \times wt\%_{Si-H}}{\frac{W_0}{88} \times 8}$$

$$\Rightarrow wt\%_{Si-H} = \frac{S_A \times W_0}{S_B \times W_1 \times 11} \times 100\%$$

The  $wt\%_{Si-H}$  means the amount of Si-H in sample.  $S_A$  and  $S_B$  mean the integral area of H peak corresponding to the Si-H and dioxane respectively.  $W_0$  and  $W_1$  mean the weight of standard dioxane and sample respectively.

**SI 5** The calculation equation of the amount of Si-H.

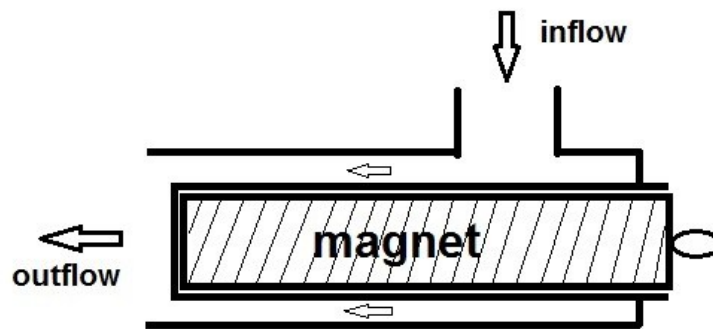

**SI 6** The simplified model of magnetic separation devices.

| Time (h) | $n_t$ (mmol) | Yield (%) | TON     | TOF ( $h^{-1}$ ) |
|----------|--------------|-----------|---------|------------------|
| 1        | 9.7978       | 56.26     | 1006.01 | 1006.01          |
| 2        | 5.7837       | 74.18     | 1326.45 | 663.22           |
| 4        | 2.9344       | 86.90     | 1553.90 | 388.48           |
| 6        | 2.8336       | 87.35     | 1561.95 | 260.32           |
| 8        | 2.5312       | 88.70     | 1586.09 | 198.26           |

$$Yield = \frac{n_0 - n_t}{n_0} \times 100\%, \quad n_0 = 22.4 \text{ mmol means the mole of original Si-H and } n_t \text{ means the mole of Si-H after the}$$

reaction.

$$TON = \frac{n_0 - n_t}{n_c}, \quad TOF = \frac{TON}{t}, \quad n_c = \frac{104mg \times 2.35\%}{195.1g/mol}, \quad n_c \text{ means the mole of Pt and } t \text{ means reaction time.}$$

**SI 7** The TON and TOF analyses.

| Reuse cycles | low-hydrogen-content silicone oil (g) | allyl polyether (g) | Toluene (mL) | 2,6-Di-tert-butyl-4-methylphenol (g) | Catalyst (mg) | Catalyst collection (mg) | Recovery (wt%) |
|--------------|---------------------------------------|---------------------|--------------|--------------------------------------|---------------|--------------------------|----------------|
| 1            | 16                                    | 41                  | 28           | 0.2                                  | 104.00        | 103.60                   | 99.62          |
| 2            | 16                                    | 41                  | 28           | 0.2                                  | 103.60        | 102.76                   | 99.19          |
| 3            | 16                                    | 41                  | 28           | 0.2                                  | 102.76        | 102.11                   | 99.37          |
| 4            | 16                                    | 41                  | 28           | 0.2                                  | 102.11        |                          |                |
| 5            | 16                                    | 41                  | 28           | 0.2                                  |               |                          |                |
| 6            | 16                                    | 41                  | 28           | 0.2                                  |               |                          |                |
| 7            | 16                                    | 41                  | 28           | 0.2                                  |               |                          |                |

**SI 8** The amount of reactants and the recovery of catalyst.
